# Supplementary material
Source: MDPI journal article supplement (https://www.mdpi.com/2073-4352/12/4/508)
Supplement: s1 [file s1]

# Effect of non-covalent interactions on the 2,4- and 3,5-dinitrobenzoate Eu-Cd complex structures

Maxim A. Shmelev<sup>1</sup>, Aleksandr S. Chistyakov<sup>1</sup>, Galina A. Razgonyaeva<sup>1</sup>, Vladimir V. Kovalev<sup>1</sup>, Julia K. Voronina<sup>1</sup>, Fedor M. Dolgushin<sup>1</sup>, Natalia V. Gogoleva<sup>1\*</sup>, Mikhail A. Kiskin<sup>1</sup>, Aleksey A. Sidorov<sup>1</sup>, Igor L. Eremenko<sup>1</sup>

<sup>1</sup>N. S. Kurnakov Institute of General and Inorganic Chemistry, Russian Academy of Sciences, 31 Leninsky prosp., 119991 Moscow, Russia

\*Correspondence: gogolevanv@inbox.ru;

Received: date; Accepted: date; Published: date

## I. Supplementary PXRD data

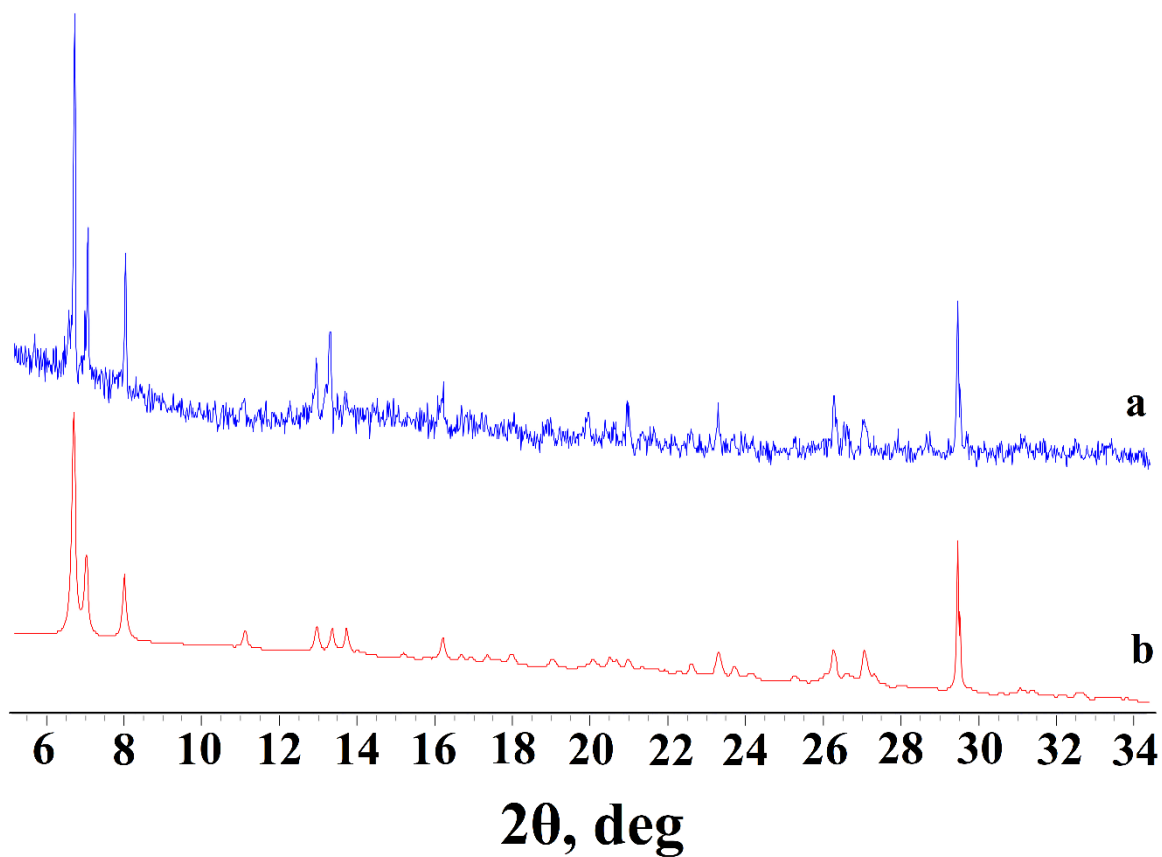

**Figure S1** - Experimental (a) and calculated (b) diffractograms for compound I.

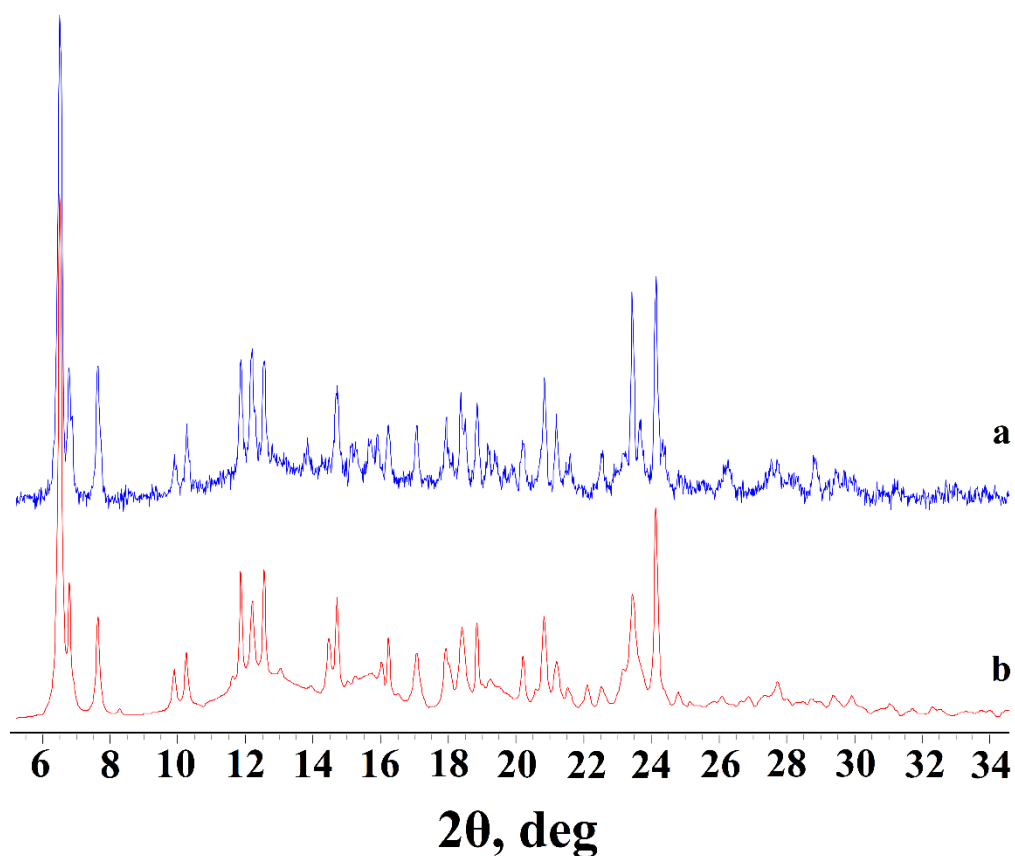

**Figure S2** - Experimental (a) and calculated (b) diffractograms for compound **II**.

## II. Supplementary structural data

**Table S1** - Crystallographic parameters and structure refinement statistics for I, II

| Compound                                          | I             | II             |
|---------------------------------------------------|---------------|----------------|
| <i>M</i>                                          | 2784.17       | 3082.37        |
| <i>T</i> (K)                                      | 100.0         | 100.0          |
| Crystal system                                    | Triclinic     | Triclinic      |
| Space group                                       | $P\bar{1}$    | $P\bar{1}$     |
| <i>a</i> (Å)                                      | 13.491(2)     | 13.6414(7)     |
| <i>b</i> (Å)                                      | 13.608(2)     | 15.4400(8)     |
| <i>c</i> (Å)                                      | 14.501(4)     | 16.1394(8)     |
| $\alpha$ (°)                                      | 104.798(9)    | 67.702(2)      |
| $\beta$ (°)                                       | 103.449(9)    | 89.380(2)      |
| $\gamma$ (°)                                      | 101.844(7)    | 72.122(2)      |
| <i>V</i> (Å <sup>3</sup> )                        | 2402.1(8)     | 2971.6(3)      |
| <i>Z</i>                                          | 1             | 1              |
| <i>D</i> <sub>calc.</sub> (g cm <sup>-3</sup> )   | 1.925         | 1.722          |
| $\mu$ (mm <sup>-1</sup> )                         | 1.848         | 1.507          |
| $\theta_{\max}$ (°)                               | 26.000        | 26.000         |
| <i>T</i> <sub>min</sub> / <i>T</i> <sub>max</sub> | 0.6476/0.7460 | 0.4831/ 0.7464 |
| Reflections collected                             | 13148         | 21944          |
| Independent reflections collected                 | 9131          | 11572          |

|                                                                    |              |               |
|--------------------------------------------------------------------|--------------|---------------|
| Reflections with $I > 2\sigma(I)$                                  | 7397         | 9106          |
| $R_{\text{int}}$                                                   | 0.0274       | 0.0692        |
| GOOF                                                               | 1.093        | 1.050         |
| $R_1 (I > 2\sigma(I))$                                             | 0.0365       | 0.0929        |
| $wR_2 (I > 2\sigma(I))$                                            | 0.0814       | 0.2531        |
| $\Delta\rho_{\text{min}}/\Delta\rho_{\text{max}} (e/\text{\AA}^3)$ | -1.091/0.847 | -3.889/ 3.117 |

**Table S2.** Continuous Shape Measures (CShM) values for the potential coordination polyhedron of Eu and Cd in **I** and **II**.

|           | Cd                                                                                                        | Eu                                                                                                               |
|-----------|-----------------------------------------------------------------------------------------------------------|------------------------------------------------------------------------------------------------------------------|
| <b>I</b>  | Octahedron, Oh (2.859)                                                                                    | Capped square antiprism, C4v (1.950)<br>Tricapped trigonal prism, D3h (2.753)<br>Muffin, Cs (1.473)              |
| <b>II</b> | Pentagonal bipyramid, D5h (9.252)<br>Capped octahedron, C3v (8.778)<br>Capped trigonal prism, C2v (8.320) | Square antiprism, D4d (0.440)<br>Triangular dodecahedron, D2d (2.207)<br>Biaugmented trigonal prism, C2v (1.393) |

**Table S3.** N-O...  $\pi$  interactions in the crystal packing of I-II.

| Взаимодействие                 | O-Cg, Å   | Symmetry code | O-Perp, Å | O-C <sub>min</sub> | N-O...Cg, ° |
|--------------------------------|-----------|---------------|-----------|--------------------|-------------|
| Complex I                      |           |               |           |                    |             |
| N(3)-O(3)... $\pi$ (2,4-Nbz)   | 3.525(5)  | 1-X,1-Y,1-Z   | 3.251     | 3.305(6)           | 127.7(3)    |
| N(6)-O(6)... $\pi$ (MeCN)      | 3.213(5)  |               |           | 3.187(8)           | 81.5(3)     |
| N(7)-O(15)... $\pi$ (2,4-Nbz)  | 3.373(5)  |               | 3.150     | 3.173(7)           | 83.7(3)     |
| N(8)-O(18)... $\pi$ (2,4-Nbz)  | 2.962(5)  | -X,1-Y,1-Z    | 2.920     | 3.061(6)           | 112.8(3)    |
| N(10)-O(24)... $\pi$ (2,4-Nbz) | 3.219(5)  | -X,1-Y,1-Z    | 3.096     | 3.141(7)           | 90.9(3)     |
| N(11)-O(26)... $\pi$ (2,4-Nbz) | 3.455(6)  | X,1+Y,Z       | 3.204     | 3.214(7)           | 143.8(5)    |
| Complex II                     |           |               |           |                    |             |
| N(4)-O(6)... $\pi$ (Phen)      | 3.567(8)  | 1-X,-Y,2-Z    | 3.129     | 3.231(13)          | 161.4(6)    |
| N(5)-O(10)... $\pi$ (Phen)     | 3.694(10) | 1+X,Y,Z       | 3.517     | 3.621(13)          | 147.2(8)    |
| N(10)-O(23)... $\pi$ (3,5-Nbz) | 3.508(10) | 2-X,-Y,1-Z    | 3.334     | 3.343(12)          | 94.2(6)     |
| N(6)-O(11)... $\pi$ (3,5-Nbz)  | 3.443(7)  |               | 3.193     | 3.208(10)          | 156.8(6)    |
| N(12)-O(30)... $\pi$ (3,5-Nbz) | 3.343(9)  |               | 3.048     | 3.049(10)          | 120.3(7)    |
| N(9)-O(21)... $\pi$ (MeCN)     | 3.261(20) |               | 3.260     |                    |             |

Note. Cg is the centroid of aromatic rings, Perp is the perpendicular to the ring plane,  $\alpha$  is the angle between the planes of aromatic moieties.

**Table S4.** C-H...O interactions in the crystal packing of I-II.

| Interaction          | Distance, Å |               |       |           | D – H...A, ° |
|----------------------|-------------|---------------|-------|-----------|--------------|
|                      | D–H         | Symmetry code | H...A | D...A     |              |
|                      | Complex I   |               |       |           |              |
| C(3S)–H(3SA)...O(14) | 0.98        |               | 2.51  | 3.074(8)  | 117          |
| C(4)–H(4)...O(4)     | 0.95        | 1-x,2-y,1-z   | 2.39  | 3.096(7)  | 131          |
| C(14)–H(14)...O(3)   | 0.95        |               | 2.56  | 3.312(7)  | 136          |
| C(18)–H(18)...N(1S)  | 0.95        | -x,1-y,2-z    | 2.51  | 3.388(10) | 153          |
| C(20)–H(20)...O(10)  | 0.95        | 1-x,1-y,2-z   | 2.39  | 3.327(7)  | 167          |
| C(28)–H(28)...O(21)  | 0.95        | -x,1-y,2-z    | 2.58  | 3.313(8)  | 134          |
| C(30)–H(30)...O(20)  | 0.95        | x,y,-1+z      | 2.52  | 3.148(8)  | 124          |
| C(36)–H(36)...O(15)  | 0.95        | x,-1+y,z      | 2.35  | 3.223(8)  | 152          |
| C(37)–H(37)...O(12)  | 0.95        | 1-x,1-y,2-z   | 2.45  | 3.359(7)  | 159          |
| C(38)–H(38)...O(9)   | 0.95        |               | 2.47  | 3.420(7)  | 173          |
|                      | Complex II  |               |       |           |              |
| C(12)–H(12)...O(25)  | 0.95        | -1+x,y,z      | 2.60  | 3.497(11) | 158          |
| C(19)–H(19)...O(29)  | 0.95        | x,-1+y,z      | 2.42  | 3.235(13) | 144          |
| C(26)–H(26)...O(28)  | 0.95        | 2-x,1-y,1-z   | 2.47  | 3.178(16) | 131          |
| C(41)–H(41)...O(24)  | 0.95        | 2-x,-y,2-z    | 2.58  | 3.438(13) | 150          |
| C(35)–H(35)...O(14)  | 0.95        | 1-x,-v,2-z    | 2.53  | 2.998(13) | 111          |

**Table S5.** N-O...N interactions in the crystal packing of I-II.

| Interaction   | Distance, Å |           | Symmetry code | O – N...O, ° |
|---------------|-------------|-----------|---------------|--------------|
|               | N...O       | O...O     |               |              |
| Complex I     |             |           |               |              |
| N(6)...O(6)   | 2.964(8)    | 3.169(6)  | x,y,1+z       | 88.1(4)      |
| N(11)...O(12) | 2.944(8)    | 3.008(7)  | 1-x,2-y,2-z   | 81.4(4)      |
| Complex II    |             |           |               |              |
| N(5)...O(27)  | 2.897(15)   | 2.964(11) | 2-x,-y,1-z    | 80.9(6)      |
| N(7)...O(23)  | 2.986(12)   | 3.143(10) | 1-x,2-y,2-z   | 85.9(5)      |

**Table S6.** Stacking interactions in the crystal packing of I-II.

| Interaction   | Cg–Cg, Å | Symmetry code | Cg–Perp, Å | C–C <sub>min</sub> | α, deg  | β, deg | γ, deg |
|---------------|----------|---------------|------------|--------------------|---------|--------|--------|
| Complex I     |          |               |            |                    |         |        |        |
| Phen –2,4-Nbz | 3.688(3) | 1-X,1-Y,1-Z   | 3.420(2)   | 3.460(7)           | 13.2(3) | 21.6   | 8.4    |
| Phen –2,4-Nbz | 3.648(3) | -X,1-Y,1-Z    | 3.470(2)   | 3.432(7)           | 1.0(3)  | 18.0   | 18.1   |
| Complex II    |          |               |            |                    |         |        |        |
| Phen – Phen   | 3.574(6) | 2-X,-Y,2-Z    | 3.349(4)   | 3.382(14)          | 0.0(5)  | 20.5   | 20.5   |

Note. Cg is the centroid of aromatic rings, Perp is the perpendicular to the ring plane, α is the angle between the planes of aromatic moieties.

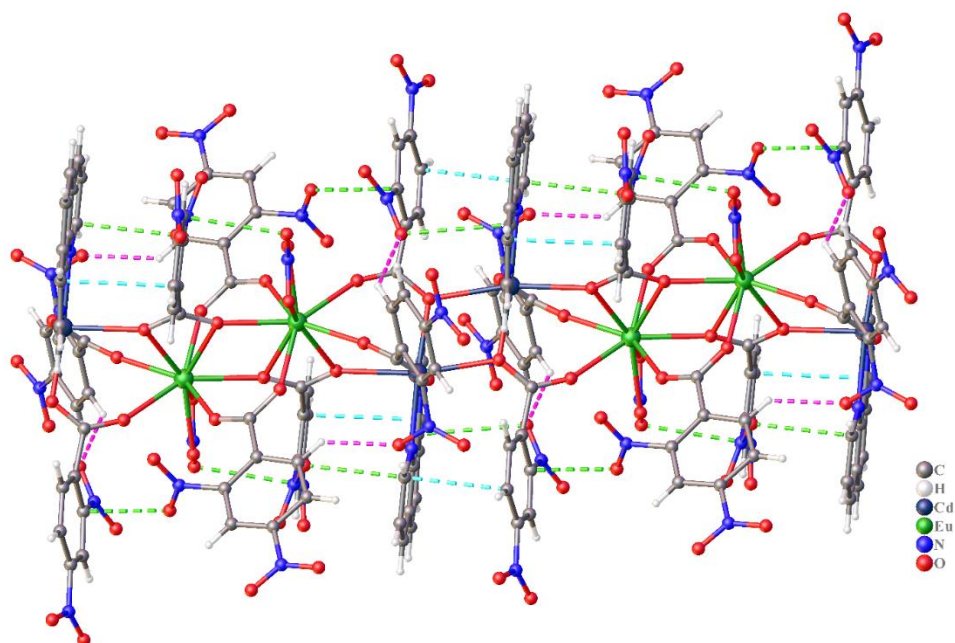

**Figure S3** – Non-covalent interactions in the structure of the complex I. Green dashed line - N-O... $\pi$  interactions, purple line - C-H...O, light blue line - stacking interactions.

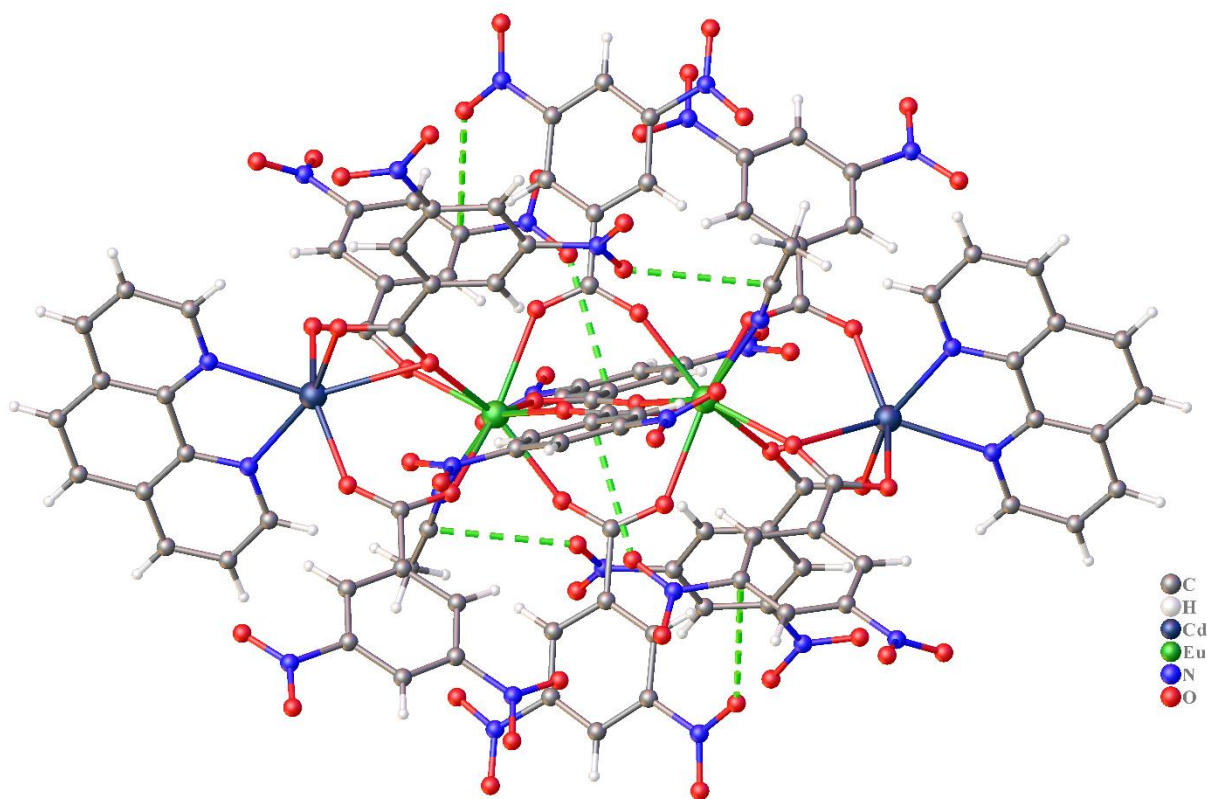

**Figure S4** – Non-covalent interactions in the structure of the complex II. Green dashed line - N-O... $\pi$  interactions.

### III. Supplementary DTA data

### III. Supplementary Differential thermal analysis (DTA) data

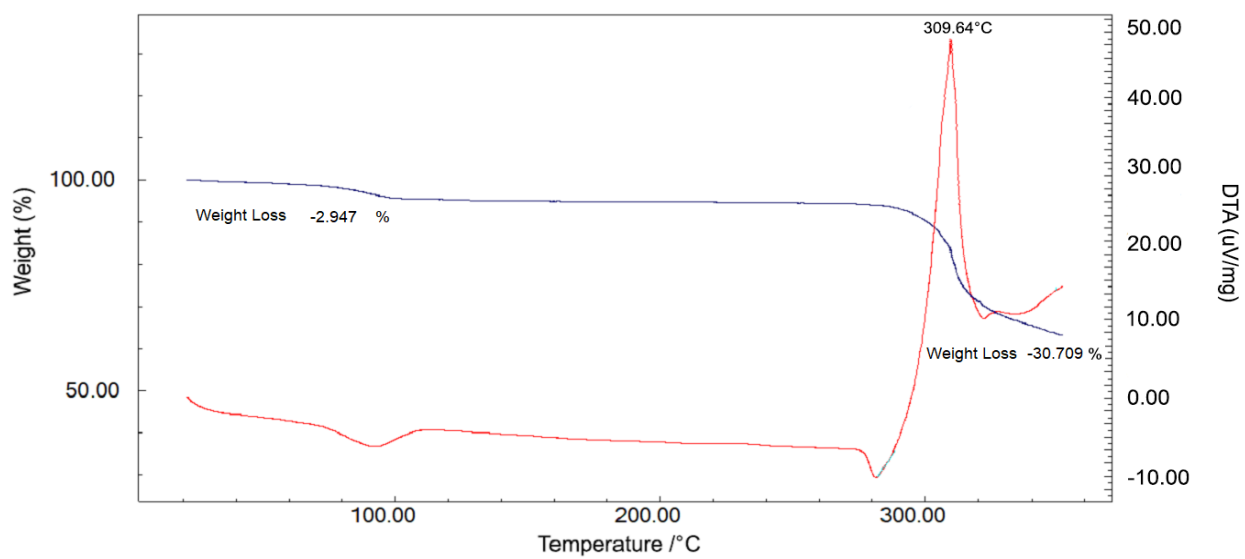

**Figure S5** – Differential thermal analysis (DTA) data for compound **II**.
